# Supplementary material for: Decline in arylsulfatase B leads to increased invasiveness of melanoma cells
Source: PubMed Central journal article supplement (PMC5354821; doi:10.18632/oncotarget.13751), 2016-12-01
Supplement: oncotarget-08-4169-s001.pdf [file oncotarget-08-4169-s001.pdf]

## Decline in arylsulfatase B leads to increased invasiveness of melanoma cells

### Supplementary Materials

**Supplementary Table S1: Effects of ARSB silencing and SHP2 dominant negative construct on SHP2 activity and on MMP2 mRNA expression**

| Treatment                                                        | M0          | M5          | M7          |
|------------------------------------------------------------------|-------------|-------------|-------------|
| <b>SHP2 Activity (nmol/mg protein/0.5h) (S.D.)</b>               |             |             |             |
| ARSB si                                                          | 1.65 (0.16) | 1.44 (0.12) | 1.36 (0.07) |
| Control si                                                       | 2.94 (0.08) | 2.55 (0.24) | 2.25 (0.24) |
| SHP2 DN                                                          | 0.22 (0.02) | 0.26 (0.02) | 0.22 (0.02) |
| Vector control                                                   | 2.93 (0.14) | 2.62 (0.06) | 2.25 (0.18) |
| <b>Pro-MMP2 mRNA (fold-change compared to M0 control) (S.D.)</b> |             |             |             |
| ARSB si                                                          | 1.61 (0.11) | 2.60 (0.19) | 3.12 (0.19) |
| Control si                                                       | 1.00 (0.08) | 1.82 (0.13) | 2.35 (0.08) |
| SHP2 DN                                                          | 2.00 (0.08) | 2.73 (0.20) | 3.08 (0.11) |
| Vector control                                                   | 1.01 (0.04) | 1.82 (0.13) | 2.23 (0.17) |
